# Supplementary material for: Optimization of Capture ELISAs for Chicken Cytokines Using Commercially Available Antibodies
Source: MDPI journal article supplement (doi:10.3390/ani12213040), 2022-11-04
Supplement: s1 [file s1]

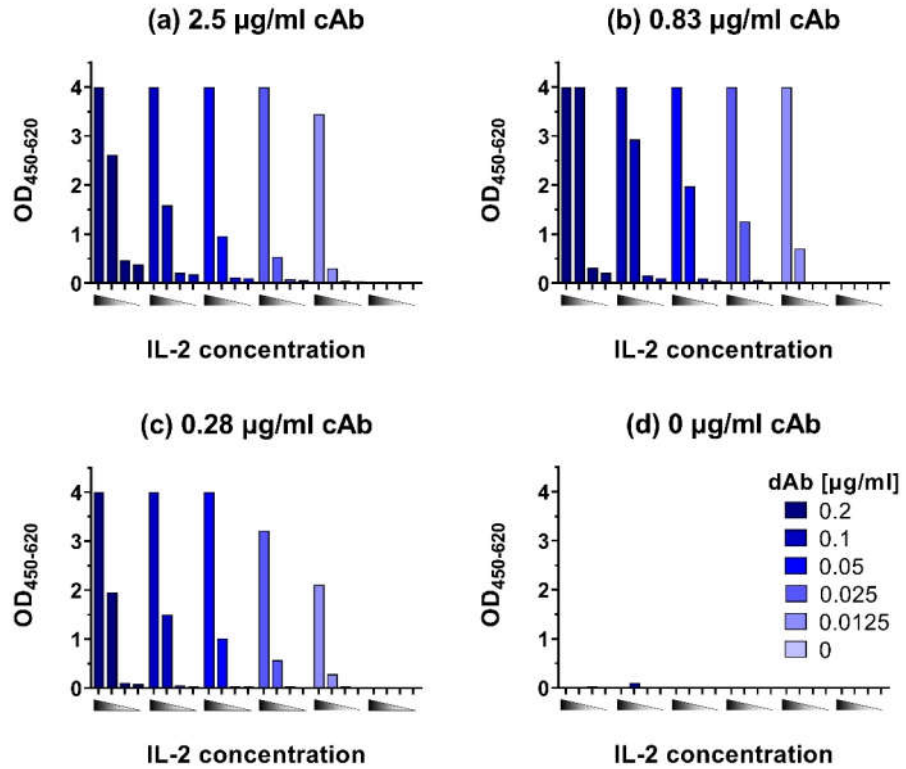

**Figure S1.** Checkerboard titration of capture antibody (cAb) at (a) 2.5 µg/ml, (b) 0.83 µg/ml, (c) 0.28 µg/ml and (d) 0 µg/ml and titration of detection antibody (dAb) with 1000, 100, 10 and 0 pg/ml recombinant IL-2 from left to right represented by ▴. Titration was performed to check for the best combination of antibodies in broad range of cytokine concentrations in presence of Tween20 in streptavidin-polyHRP80.

**Table S1.** Lower limit of detection (LLOD) in 5% chicken serum which is simulating more complex matrix of cell culture supernatant

|              | IL-2 | IL-6  | IL-10 | IL-12p40 | IFN-γ |
|--------------|------|-------|-------|----------|-------|
| LLOD [pg/ml] | 5.65 | 22.87 | 32.83 | 10.41    | 1.03  |

The LLOD concentrations were calculated by interpolating from calibration curve the values of the mean OD<sub>450-620</sub> + 2×SD of 24 blank samples containing dilution buffer only.
